# Supplementary material
Source: PubMed Central journal article supplement (PMC1324999)

# All females

Interaction D10Mit106-D12Mit34

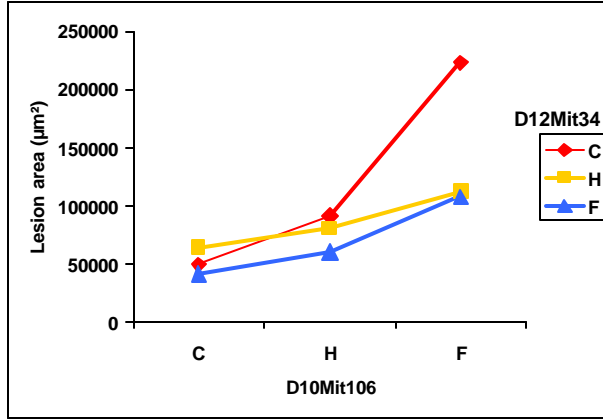

Interaction D10Mit213-D1Mit123

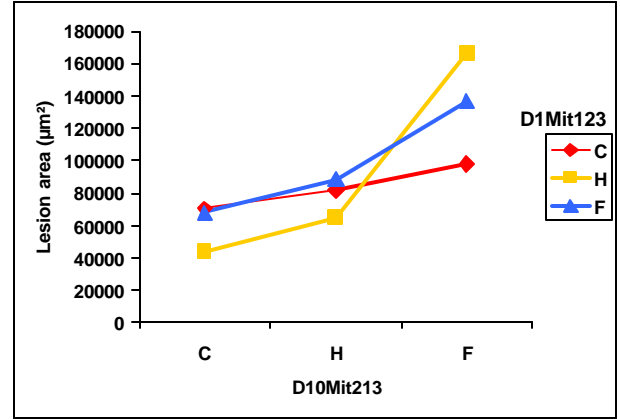

Interaction D18Mit121-D8Mit166

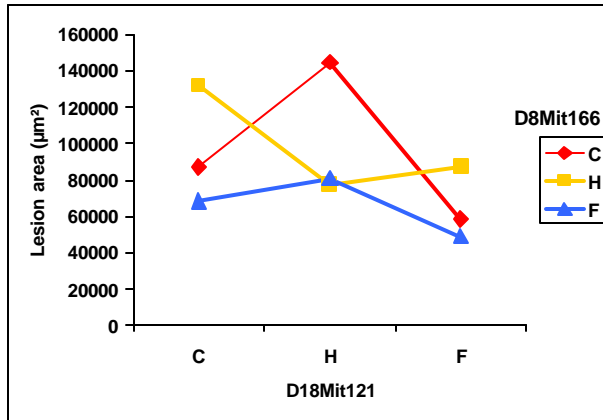

Interaction D3Mit45-D18Mit94

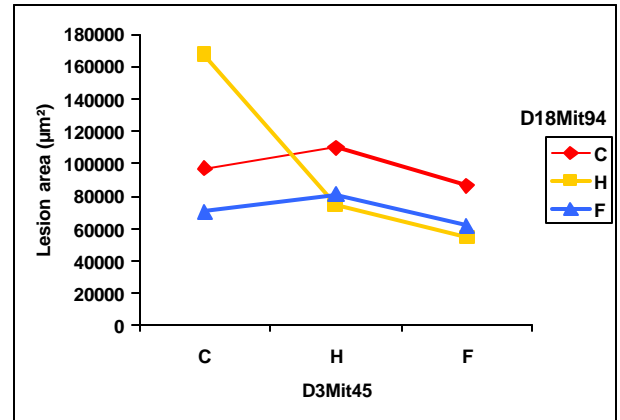

Interaction D3Mit19-D12Mit222

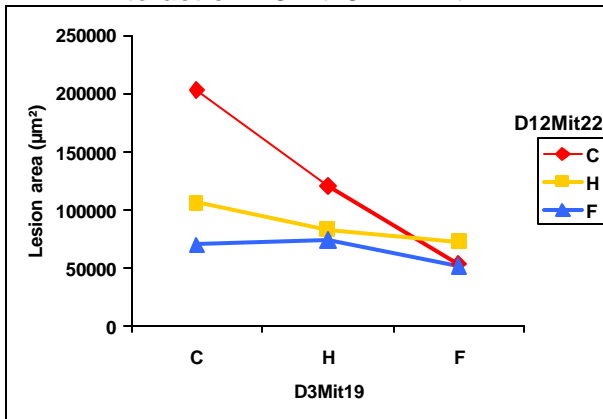

# Females cross mB6xfFVB

Interaction D10Mit206-D11Mit303

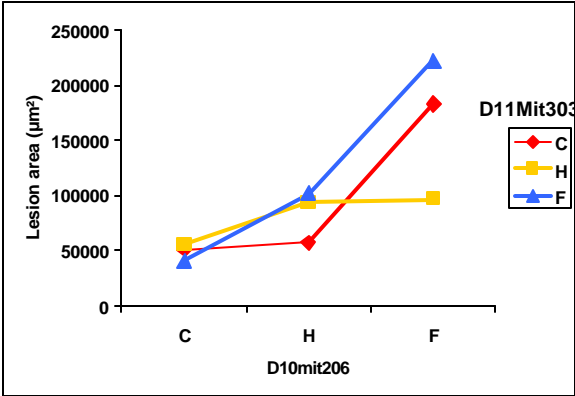

Interaction D10Mit213-D18Mit23

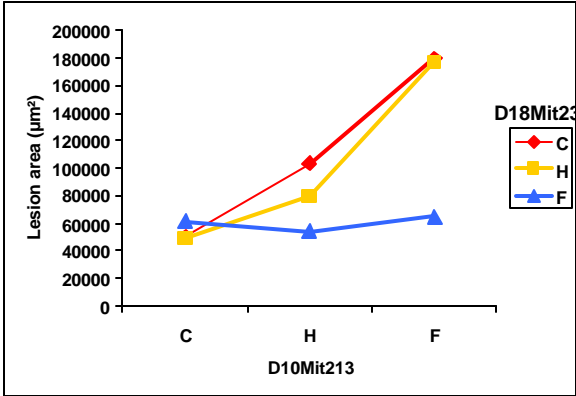

Interaction D10Mit49-D12Mit84

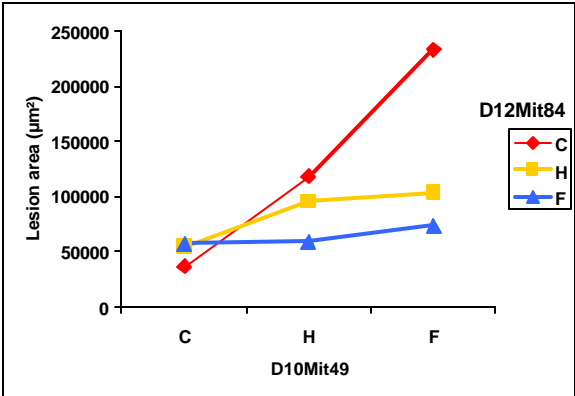

Interaction D10Mit213-D1Mit178

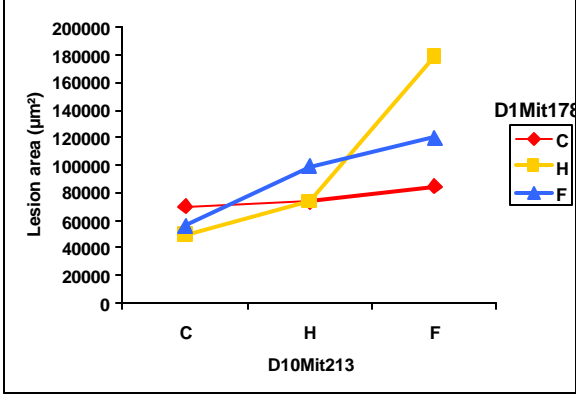

# Females cross mFVBxfB6

Interaction D10Mit214-D11Mit303

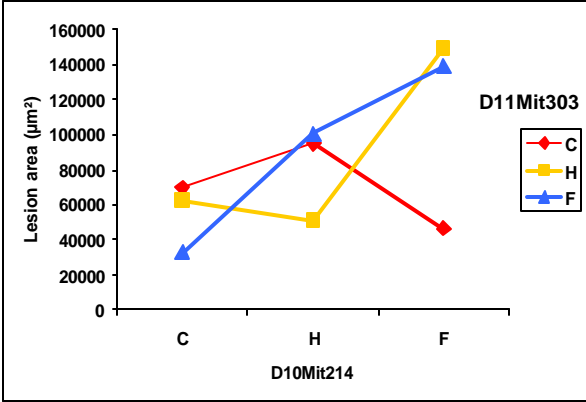

Interaction D10Mit106-D12Mit34

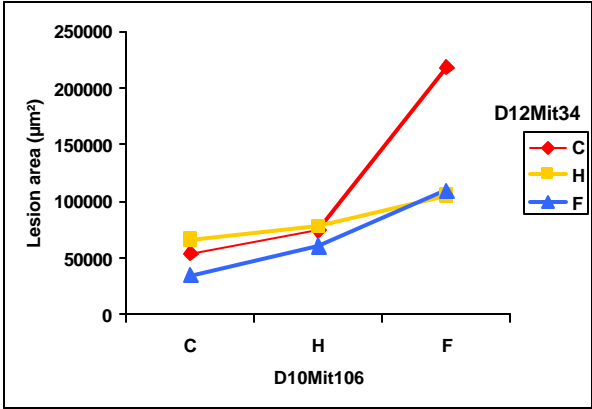

Interaction D10Mit16-D1Mit213

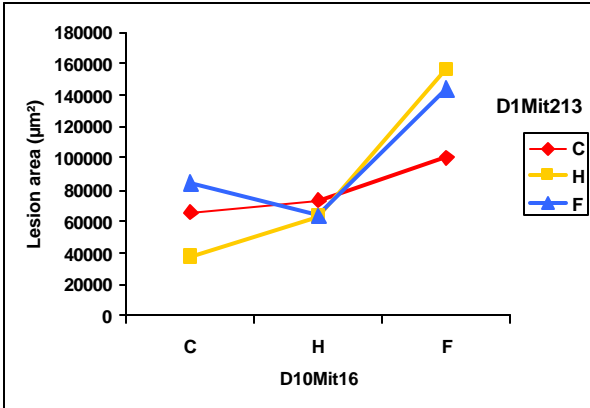

Interaction D10Mit16-D7Mit101

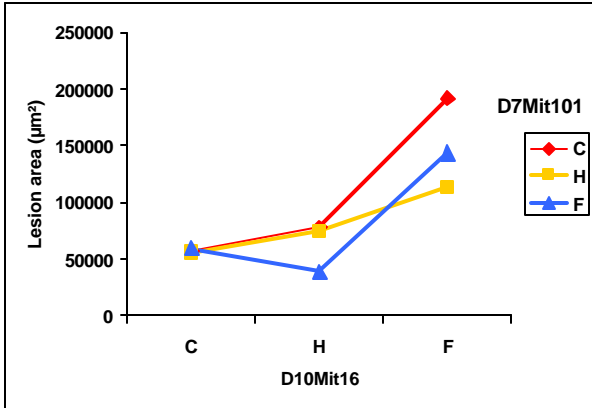

Interaction D3Mit57-D7mit253

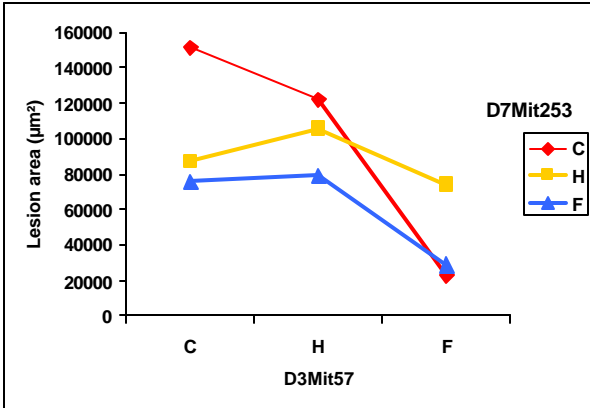

# All males

### Interaction D10Mit49-D2Mit409

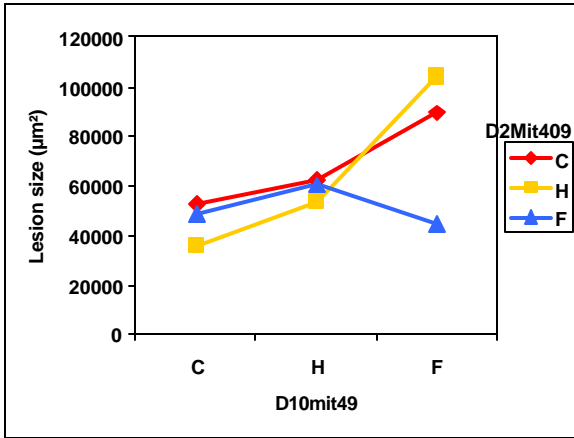

# Males cross mFVBxfB6

### Interaction D12Mit12-D15Mit128

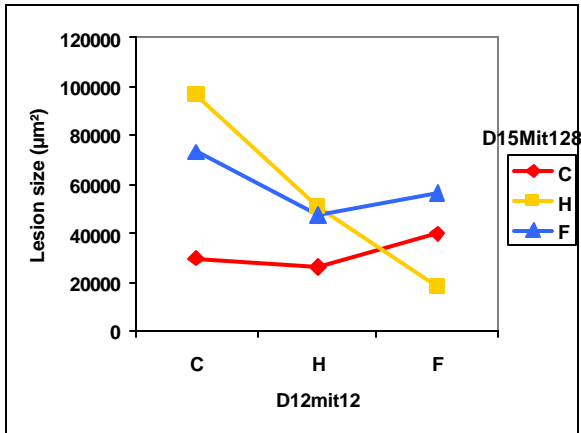

Supplement: pnas_0509570102_2.pdf [file pnas_0509570102_2.pdf]
