# Supplementary material
Source: PubMed Central journal article supplement (PMC1324999)

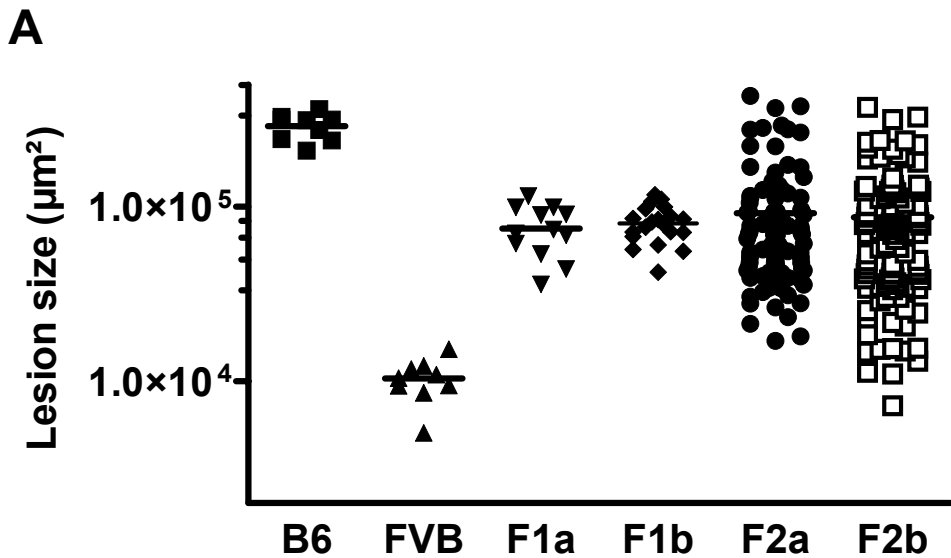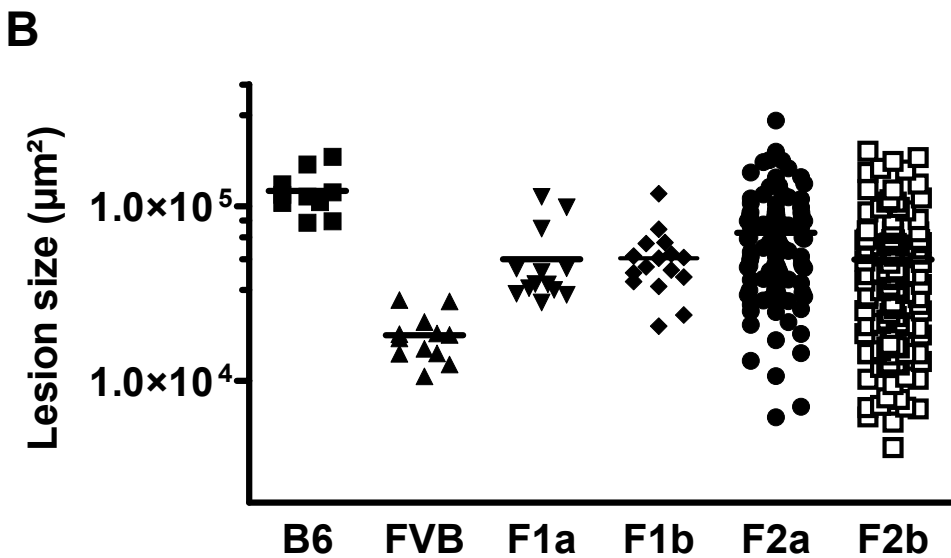

Supplement: pnas_0509570102_1.pdf [file pnas_0509570102_1.pdf]
